# Supplementary material for: Development of Disease-Resistance-Associated Microsatellite DNA Markers for Selective Breeding of Tilapia (Oreochromis spp.) Farmed in Taiwan
Source: MDPI journal article supplement (doi:10.3390/genes13010099), 2021-12-31
Supplement: s1 [file s1]

## Supplementary Materials

**Supplementary Materials:** The following are available online at. Figure S1. The receiver operating characteristic curve (ROC curve) of the training and testing sets. Table S1: KOG orthologous group clustering analysis. Table S2: Distribution of the top 50 KEGG pathways and annotations of the NT1 strain. Table S3: GO annotation distribution of NT1. Table S4: The differential gene expression of *hepcidin*-, *progranulin*-, and *piscidin*- related transcripts after *S. iniae* infection. Table S5: Primer list. Table S6: *Streptococcus iniae* challenge after 14 days. Table S7. The alleles frequency of the disease-resistance-associated microsatellites. Table S8: The results of heterozygosity, *f*-statistics, and polymorphism by population for codominant data. Table S9: Pairwise population  $F_{ST}$  values and estimates of  $N_m$ . Table S10: The genotypes with count, % within group, and % within genotype in the dead and alive group. Table S11: The different combinations of genotypes and the predictive results of the new *Streptococcus*-resistant groups (F1) through SVM predictive model. Attachment 1: The raw data and predictive results of the predictive model.

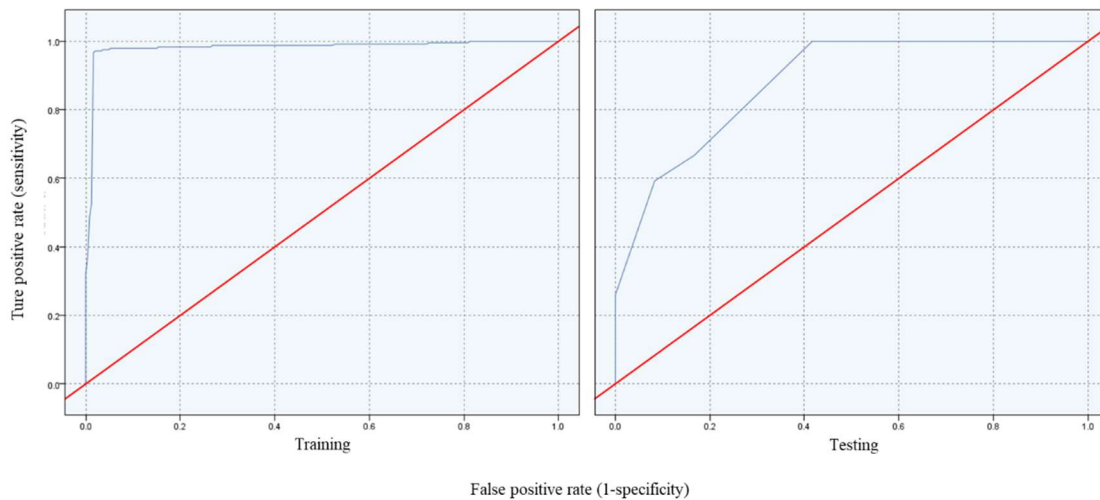

**Figure S1.** The receiver operating characteristic curve (ROC curve) of the training and testing sets. The x-axis is the false positive rate (1 – specificity) and the y-axis is the true positive rate (sensitivity). The blue line is the ROC curve and the red line is the diagonal line. The area under curve (AUC) is 0.983 in the training set and 0.849 in the testing set.

**Table S1.** KOG orthologous group clustering analysis. A total of 59,393 transcripts were annotated to 25 KOG orthologous groups.

| KOG Description                                               | Count | Percentage |
|---------------------------------------------------------------|-------|------------|
| <b>Information storage and processing</b>                     |       |            |
| Translation, ribosomal structure, and biogenesis              | 938   | 1.45%      |
| RNA processing and modification                               | 1470  | 2.27%      |
| Transcription                                                 | 3316  | 5.12%      |
| Replication, recombination, and repair                        | 907   | 1.40%      |
| Chromatin structure and dynamics                              | 679   | 1.05%      |
| <b>Cellular processing and signaling</b>                      |       |            |
| Cell cycle control, cell division, chromosome partitioning    | 1163  | 1.80%      |
| Nuclear structure                                             | 190   | 0.29%      |
| Defense mechanisms                                            | 2415  | 3.73%      |
| Signal transduction mechanisms                                | 11789 | 18.20%     |
| Cell wall/membrane/envelope biogenesis                        | 387   | 0.60%      |
| Cell motility                                                 | 293   | 0.45%      |
| Cytoskeleton                                                  | 2688  | 4.15%      |
| Extracellular structures                                      | 1429  | 2.21%      |
| Intracellular trafficking, secretion, and vesicular transport | 2797  | 4.32%      |

|                                                              |       |        |
|--------------------------------------------------------------|-------|--------|
| Posttranslational modification, protein turnover, chaperones | 4294  | 6.63%  |
| <b>Metabolism</b>                                            |       |        |
| Energy production and conversion                             | 1035  | 1.60%  |
| Carbohydrate transport and metabolism                        | 1361  | 2.10%  |
| Amino acid transport and metabolism                          | 1513  | 2.34%  |
| Nucleotide transport and metabolism                          | 704   | 1.09%  |
| Coenzyme transport and metabolism                            | 305   | 0.47%  |
| Lipid transport and metabolism                               | 1805  | 2.79%  |
| Inorganic ion transport and metabolism                       | 1831  | 2.83%  |
| Secondary metabolites biosynthesis, transport and catabolism | 938   | 1.45%  |
| <b>Poorly characterized</b>                                  |       |        |
| General function prediction only                             | 10870 | 16.78% |
| Function unknown                                             | 9665  | 14.92% |

**Table S2.** Distribution of the top 50 KEGG pathways and annotations of the NT1 strain. The table presents the top 50 pathways, K-number frequencies, and *p* value. A total of 22,690 transcripts were mapped to 377 KEGG pathways.

| Pathway name                                                      | K-number frequencies | <i>p</i> value |
|-------------------------------------------------------------------|----------------------|----------------|
| Epstein–Barr virus infection                                      | 136 out of 4454      | 0.001          |
| Endocytosis                                                       | 170 out of 4454      | 0.002          |
| RNA transport                                                     | 125 out of 4454      | 0.002          |
| Protein processing in endoplasmic reticulum                       | 124 out of 4454      | 0.002          |
| Viral carcinogenesis                                              | 124 out of 4454      | 0.002          |
| Ribosome                                                          | 119 out of 4454      | 0.003          |
| Spliceosome                                                       | 113 out of 4454      | 0.004          |
| Tight junction                                                    | 98 out of 4454       | 0.008          |
| Lysosome                                                          | 95 out of 4454       | 0.009          |
| Autophagy—animal                                                  | 94 out of 4454       | 0.009          |
| Apoptosis                                                         | 94 out of 4454       | 0.009          |
| Fluid shear stress and atherosclerosis                            | 87 out of 4454       | 0.013          |
| Oxidative phosphorylation                                         | 105 out of 4454      | 0.033          |
| Ribosome biogenesis in eukaryotes                                 | 65 out of 4454       | 0.040          |
| RNA degradation                                                   | 58 out of 4454       | 0.057          |
| PI3K–Akt signaling pathway                                        | 203 out of 4454      | 0.060          |
| Cell cycle—yeast                                                  | 57 out of 4454       | 0.060          |
| mRNA surveillance pathway                                         | 55 out of 4454       | 0.066          |
| Adherens junction                                                 | 55 out of 4454       | 0.066          |
| Mitophagy—animal                                                  | 53 out of 4454       | 0.073          |
| ECM–receptor interaction                                          | 53 out of 4454       | 0.073          |
| Non-alcoholic fatty liver disease (NAFLD)                         | 115 out of 4454      | 0.075          |
| Epithelial cell signaling in <i>Helicobacter pylori</i> infection | 50 out of 4454       | 0.085          |
| Renal cell carcinoma                                              | 50 out of 4454       | 0.085          |
| Autophagy—yeast                                                   | 49 out of 4454       | 0.089          |
| Ubiquitin mediated proteolysis                                    | 109 out of 4454      | 0.092          |
| Carbon metabolism                                                 | 80 out of 4454       | 0.093          |
| Thyroid hormone signaling pathway                                 | 80 out of 4454       | 0.093          |
| Lysine degradation                                                | 48 out of 4454       | 0.094          |
| Biosynthesis of amino acids                                       | 47 out of 4454       | 0.098          |
| B cell receptor signaling pathway                                 | 47 out of 4454       | 0.098          |
| Necroptosis                                                       | 78 out of 4454       | 0.101          |
| PPAR signaling pathway                                            | 45 out of 4454       | 0.109          |
| Pyrimidine metabolism                                             | 75 out of 4454       | 0.114          |

|                                             |                 |       |
|---------------------------------------------|-----------------|-------|
| Inositol phosphate metabolism               | 44 out of 4454  | 0.114 |
| Longevity regulating pathway—worm           | 43 out of 4454  | 0.120 |
| Purine metabolism                           | 127 out of 4454 | 0.122 |
| Renin secretion                             | 42 out of 4454  | 0.126 |
| NF-kappa B signaling pathway                | 72 out of 4454  | 0.128 |
| T cell receptor signaling pathway           | 72 out of 4454  | 0.128 |
| TNF signaling pathway                       | 72 out of 4454  | 0.128 |
| Valine, leucine, and isoleucine degradation | 41 out of 4454  | 0.133 |
| Platinum drug resistance                    | 41 out of 4454  | 0.133 |
| Cell cycle                                  | 97 out of 4454  | 0.139 |
| Apoptosis—fly                               | 40 out of 4454  | 0.139 |
| Synaptic vesicle cycle                      | 40 out of 4454  | 0.139 |
| Sphingolipid signaling pathway              | 69 out of 4454  | 0.144 |
| Toxoplasmosis                               | 69 out of 4454  | 0.144 |
| Nucleotide excision repair                  | 39 out of 4454  | 0.146 |
| Peroxisome                                  | 68 out of 4454  | 0.149 |

**Table S3.** GO annotation distribution of NT1. A total of 22,788 transcripts were annotated to 56 GO functional groups ( $p < 0.01$ ).

| Gene term name                                                                                        | Transcript ID frequency | <i>p</i> value |
|-------------------------------------------------------------------------------------------------------|-------------------------|----------------|
| oxidoreductase activity                                                                               | 1147 out of 22690       | 3E-10          |
| coenzyme binding                                                                                      | 418 out of 22690        | 7E-07          |
| iron ion binding                                                                                      | 221 out of 22690        | 9E-07          |
| oxidoreductase activity, acting on peroxide as acceptor                                               | 39 out of 22690         | 1E-05          |
| oxidoreductase activity, acting on paired donors, with incorporation or reduction of molecular oxygen | 197 out of 22690        | 5E-05          |
| antioxidant activity                                                                                  | 83 out of 22690         | 7E-05          |
| translation factor activity, RNA binding                                                              | 108 out of 22690        | 1E-04          |
| phosphofructokinase activity                                                                          | 67 out of 22690         | 2E-04          |
| carbohydrate kinase activity                                                                          | 67 out of 22690         | 2E-04          |
| cyclase regulator activity                                                                            | 20 out of 22690         | 2E-04          |
| cyclase activator activity                                                                            | 20 out of 22690         | 2E-04          |
| guanylate cyclase regulator activity                                                                  | 20 out of 22690         | 2E-04          |
| guanylate cyclase activator activity                                                                  | 20 out of 22690         | 2E-04          |
| thiamine pyrophosphate binding                                                                        | 33 out of 22690         | 6E-04          |
| cyclin-dependent protein serine/threonine kinase activity                                             | 24 out of 22690         | 8E-04          |
| cyclin-dependent protein kinase activity                                                              | 24 out of 22690         | 8E-04          |
| enzyme inhibitor activity                                                                             | 214 out of 22690        | 8E-04          |
| endopeptidase inhibitor activity                                                                      | 147 out of 22690        | 0.001          |
| endopeptidase regulator activity                                                                      | 147 out of 22690        | 0.001          |
| cofactor binding                                                                                      | 340 out of 22690        | 0.001          |
| protein kinase regulator activity                                                                     | 33 out of 22690         | 0.001          |
| heme binding                                                                                          | 211 out of 22690        | 0.002          |
| oxidoreductase activity, acting on the CH-NH group of donors                                          | 39 out of 22690         | 0.002          |
| threonine-type endopeptidase activity                                                                 | 24 out of 22690         | 0.002          |
| threonine-type peptidase activity                                                                     | 24 out of 22690         | 0.002          |
| NAD binding                                                                                           | 162 out of 22690        | 0.002          |
| structural constituent of cytoskeleton                                                                | 51 out of 22690         | 0.003          |
| 6-phosphofructokinase activity                                                                        | 15 out of 22690         | 0.003          |
| oxidoreductase activity, acting on the CH-NH group of donors, NAD or NADP as acceptor                 | 38 out of 22690         | 0.003          |

|                                                                                       |                  |       |
|---------------------------------------------------------------------------------------|------------------|-------|
| protein kinase inhibitor activity                                                     | 21 out of 22690  | 0.003 |
| hydrolase activity, hydrolyzing N-glycosyl compounds                                  | 21 out of 22690  | 0.003 |
| kinase inhibitor activity                                                             | 21 out of 22690  | 0.003 |
| peroxiredoxin activity                                                                | 21 out of 22690  | 0.003 |
| peroxidase activity                                                                   | 18 out of 22690  | 0.003 |
| protein serine/threonine kinase inhibitor activity                                    | 18 out of 22690  | 0.003 |
| phosphatidylinositol phosphate binding                                                | 11 out of 22690  | 0.003 |
| peptidase inhibitor activity                                                          | 162 out of 22690 | 0.003 |
| peptidase regulator activity                                                          | 162 out of 22690 | 0.003 |
| oxidoreductase activity, acting on the CH-OH group of donors, NAD or NADP as acceptor | 177 out of 22690 | 0.003 |
| intramolecular transferase activity                                                   | 35 out of 22690  | 0.003 |
| fatty-acyl-CoA binding                                                                | 37 out of 22690  | 0.004 |
| vitamin binding                                                                       | 110 out of 22690 | 0.004 |
| NAD+ binding                                                                          | 25 out of 22690  | 0.004 |
| glycerone kinase activity                                                             | 14 out of 22690  | 0.004 |
| oxidoreductase activity, acting on the CH-CH group of donors, oxygen as acceptor      | 14 out of 22690  | 0.004 |
| translation initiation factor activity                                                | 61 out of 22690  | 0.004 |
| metalloendopeptidase inhibitor activity                                               | 10 out of 22690  | 0.005 |
| 6-phosphofructo-2-kinase activity                                                     | 52 out of 22690  | 0.006 |
| oxidoreductase activity, acting on CH-OH group of donors                              | 179 out of 22690 | 0.006 |
| cyclin-dependent protein serine/threonine kinase regulator activity                   | 16 out of 22690  | 0.007 |
| oxidoreductase activity, acting on diphenols and related substances as donors         | 16 out of 22690  | 1E-04 |
| structural constituent of myelin sheath                                               | 16 out of 22690  | 2E-04 |
| acyl-CoA oxidase activity                                                             | 13 out of 22690  | 2E-04 |
| ribosome binding                                                                      | 13 out of 22690  | 2E-04 |
| oxidoreductase activity, acting on NAD(P)H, quinone or similar compound as acceptor   | 45 out of 22690  | 2E-04 |
| phosphatidylinositol-3-phosphate binding                                              | 9 out of 22690   | 2E-04 |

**Table S4.** The differential gene expression of hepcidin-, progranulin-, and piscidin- related transcripts after *S. iniae* infection.

| Transcript ID        | Length | Description                 | FPKM NT1 | FPKM NT1S |
|----------------------|--------|-----------------------------|----------|-----------|
| NT1_GG17866 c0_g1_i1 | 387    | PREDICTED: hepcidin-like    | 0.65     | 2.28      |
| NT1_GG18280 c0_g1_i1 | 226    | PREDICTED: hepcidin-like    | 0        | 2.71      |
| NT1_GG43388 c0_g1_i1 | 420    | PREDICTED: hepcidin-like    | 0.19     | 2.14      |
| NT1_GG43388 c0_g1_i2 | 411    | PREDICTED: hepcidin-like    | 0.58     | 2.84      |
| NT1_GG33569 c2_g1_i2 | 1902   | PREDICTED: progranulin-like | 12.3     | 9.46      |
| NT1_GG33570 c1_g2_i4 | 1450   | progranulin precursor       | 41.25    | 37.95     |
| NT1_GG22982 c0_g1_i4 | 722    | PREDICTED: piscidin-like    | 13.7     | 29.29     |

**Table S5.** Primer list.

| SSR  | SSR name     | Primer sequence                                                         |
|------|--------------|-------------------------------------------------------------------------|
| SSR1 | OnHAMP2-SSR1 | F: gagcacgaggacactgaCCACACAATCAACACACTGGTA<br>R: TCAAACAGAAACAGGGACACAC |
| SSR2 | OnHAMP2-SSR2 | F: gagcacgaggacactgaGCACAGACACAGTAACACATGC<br>R: ACTCCCTGGTACATGCTTCCTA |
| SSR3 | OnHAMP2-SSR3 | F: gagcacgaggacactgaTAGGAAGCATGTACCAGGGAGT<br>R: AAAATCACTCAACCGTGTCTT  |
| SSR4 | OnHAMP2-SSR4 | F: gagcacgaggacactgaCACCAGTGTCAACTGGCTAATG<br>R: GTTACCTTCTTGATACCGCAGG |
| SSR5 | OnHAMP2-SSR5 | F: gagcacgaggacactgaCTTTGGGTAGAGGAACACTCCA<br>R: TGCAGGTCAATAGCAATACCAC |

|       |               |                                                                          |
|-------|---------------|--------------------------------------------------------------------------|
| SSR6  | OnHAMP1a-SSR1 | F: gagcacgaggacactgaCAGTGGGTGTTTGTTCCTTACA<br>R: TAGTAGGCTTTGTGTGCATTCC  |
| SSR7  | OnHAMP1a-SSR2 | F: gagcacgaggacactgaCCACACGCACTCTCACCA<br>R: CTGGTAGCCTTGACCCAGTTT       |
| SSR8  | OnHAMP1b-SSR1 | F: gagcacgaggacactgaCCCCATAGCACTCCTTTTATTG<br>R: TCATTTGGAGGTGTTTTACAG   |
| SSR9  | OnHAMP1b-SSR2 | F: gagcacgaggacactgaGCGCTGTATAAGATTCCCGTTA<br>R: GGAAACACAAGAGACATGAGCA  |
| SSR10 | OnHAMP1b-SSR3 | F: gagcacgaggacactgaGTTTGTAGCTTAACCCATTTCGC<br>R: TGCCTTTGTTTAGATGAACTGC |
| SSR11 | OnHAMP4a-SSR  | F: gagcacgaggacactgaAAGTGTCTGTTCCACCCACAT<br>R: ACAGAGTGTTCTGGCTTTCACA   |
| SSR12 | OnHAM1c-SSR1  | F: gagcacgaggacactgaGTGCATTACAGAGTGTTCTGGC<br>R: GTCTGGAGCCAAAGTGTCTGTT  |
| SSR13 | OnHAM1c-SSR2  | F: gagcacgaggacactgaTTAAATGGGCTCAGGAGAAAG<br>R: ACACACATAGATTCATCCGCAC   |
| SSR14 | OnHAMP1d-SSR1 | F: gagcacgaggacactgaTCGGAATTGAGCATTAAGACCT<br>R: GGTCCCCATAGAACTCCTTTT   |
| SSR15 | OnHAMP1d-SSR2 | F: gagcacgaggacactgaCAACAAGTGAAGCGACCATATT<br>R: TCACACACAAGCAGGTCAATTA  |
| SSR16 | OnHAMP1d-SSR3 | F: gagcacgaggacactgaGTGGGAAACACAAGAGACATGA<br>R: CAGGGCTGAGATAGATTTTGGT  |
| SSR17 | OnHAMP1g-SSR  | F: gagcacgaggacactgaGGTCCCCATAGAACTCTTTT<br>R: TCGGAATTGAGCATTAAGACCT    |
| SSR18 | OnPGRN-SSR1   | F: gagcacgaggacactgaTGAAAGGAGAACTGAAGCACAA<br>R: TCTGGATTTGATGGAATGTCTG  |
| SSR19 | OnPGRN-SSR2   | F: gagcacgaggacactgaGGACCCTGAATCTTCCCTTAGT<br>R: GGCTCTCTCTCTTGAGTTGGAC  |
| SSR20 | OnPGRN-SSR3   | F: gagcacgaggacactgaCTCAGGACTTGCTGTGATGATT<br>R: TGTAGCGGTTTCATTTGTTTAC  |
| SSR21 | OnPGRN-SSR4   | F: gagcacgaggacactgaACTAGCAGATGATAAATGCGCC<br>R: ATGCCAGACCTAAATCCTACA   |
| SSR22 | OnTP4-SSR     | F: gagcacgaggacactgaTGTATGTAGCCGAAGTAGCCAA<br>R: CCTTGCAGTGAACCCTTTGTAT  |

gagcacgaggacactga is the adapter sequences.

**Table S6.** *Streptococcus iniae* challenge after 14 days. Total number of A is 200; B is 198; N2 is 197.

|        | <b>A</b>          | <b>B</b>          | <b>N2</b>           |
|--------|-------------------|-------------------|---------------------|
| Dose   | 2*10 <sup>6</sup> | 6*10 <sup>5</sup> | 6.5*10 <sup>5</sup> |
| Day 0  | 0                 | 0                 | 0                   |
| Day 1  | 45                | 44                | 130                 |
| Day 2  | 67                | 29                | 20                  |
| Day 3  | 12                | 18                | 6                   |
| Day 4  | 6                 | 16                | 1                   |
| Day 5  | 2                 | 6                 | 0                   |
| Day 6  | 1                 | 25                | 0                   |
| Day 7  | 4                 | 1                 | 0                   |
| Day 8  | 3                 | 1                 | 0                   |
| Day 9  | 1                 | 1                 | 0                   |
| Day 10 | 1                 | 4                 | 0                   |
| Day 11 | 2                 | 0                 | 0                   |

|                 |        |        |        |
|-----------------|--------|--------|--------|
| Day 12          | 0      | 0      | 0      |
| Day 13          | 0      | 0      | 0      |
| Day 14          | 0      | 0      | 0      |
| Residual amount | 58     | 53     | 40     |
| Lethal dose     | 71.287 | 73.232 | 79.695 |

**Table S7.** The alleles frequency of the disease-resistance-associated microsatellites.

| SSR   | pop | A     | B     | C     | D     | E     | F     | G     | H     | I     | J     | K     | L     | M     | N     | O     | P     | Q     | R     |
|-------|-----|-------|-------|-------|-------|-------|-------|-------|-------|-------|-------|-------|-------|-------|-------|-------|-------|-------|-------|
| SSR2  | A   | 0.180 | 0.243 | 0.459 | 0.052 | 0.019 | 0.047 |       |       |       |       |       |       |       |       |       |       |       |       |
|       | B   | 0.000 | 0.677 | 0.245 | 0.078 | 0.000 | 0.000 |       |       |       |       |       |       |       |       |       |       |       |       |
|       | N2  | 0.000 | 0.333 | 0.556 | 0.000 | 0.016 | 0.095 |       |       |       |       |       |       |       |       |       |       |       |       |
| SSR4  | A   | 0.005 | 0.128 | 0.547 | 0.039 | 0.281 |       |       |       |       |       |       |       |       |       |       |       |       |       |
|       | B   | 0.372 | 0.000 | 0.266 | 0.361 | 0.000 |       |       |       |       |       |       |       |       |       |       |       |       |       |
|       | N2  | 0.000 | 0.000 | 0.568 | 0.432 | 0.000 |       |       |       |       |       |       |       |       |       |       |       |       |       |
| SSR5  | A   | 0.000 | 0.191 | 0.000 | 0.249 | 0.336 | 0.027 | 0.000 | 0.000 | 0.000 | 0.000 | 0.000 | 0.087 | 0.109 | 0.000 | 0.000 | 0.000 | 0.000 |       |
|       | B   | 0.000 | 0.000 | 0.247 | 0.000 | 0.000 | 0.008 | 0.013 | 0.021 | 0.023 | 0.148 | 0.039 | 0.104 | 0.000 | 0.000 | 0.029 | 0.026 | 0.294 | 0.047 |
|       | N2  | 0.353 | 0.000 | 0.626 | 0.000 | 0.000 | 0.010 | 0.005 | 0.000 | 0.000 | 0.000 | 0.005 | 0.000 | 0.000 | 0.000 | 0.000 | 0.000 | 0.000 | 0.000 |
| SSR7  | A   | 0.000 | 0.003 | 0.495 | 0.503 | 0.000 | 0.000 | 0.000 |       |       |       |       |       |       |       |       |       |       |       |
|       | B   | 0.000 | 0.031 | 0.414 | 0.247 | 0.240 | 0.036 | 0.031 |       |       |       |       |       |       |       |       |       |       |       |
|       | N2  | 0.000 | 0.063 | 0.464 | 0.201 | 0.117 | 0.156 | 0.000 |       |       |       |       |       |       |       |       |       |       |       |
| SSR8  | A   | 0.012 | 0.315 | 0.106 | 0.015 | 0.006 | 0.124 | 0.424 | 0.000 | 0.000 | 0.000 | 0.000 | 0.000 |       |       |       |       |       |       |
|       | B   | 0.000 | 0.000 | 0.000 | 0.000 | 0.067 | 0.326 | 0.000 | 0.090 | 0.152 | 0.045 | 0.174 | 0.146 |       |       |       |       |       |       |
|       | N2  | 0.000 | 0.000 | 0.000 | 0.806 | 0.194 | 0.000 | 0.000 | 0.000 | 0.000 | 0.000 | 0.000 | 0.000 |       |       |       |       |       |       |
| SSR14 | A   | 0.000 | 0.014 | 0.657 | 0.000 | 0.078 | 0.000 | 0.005 | 0.211 | 0.000 | 0.022 | 0.014 | 0.000 | 0.000 | 0.000 |       |       |       |       |
|       | B   | 0.098 | 0.005 | 0.142 | 0.424 | 0.000 | 0.055 | 0.109 | 0.003 | 0.055 | 0.038 | 0.011 | 0.027 | 0.016 | 0.016 |       |       |       |       |
|       | N2  | 0.000 | 0.000 | 0.482 | 0.161 | 0.000 | 0.289 | 0.000 | 0.023 | 0.000 | 0.000 | 0.000 | 0.044 | 0.000 | 0.000 |       |       |       |       |
| SSR17 | A   | 0.747 | 0.005 | 0.055 | 0.003 | 0.156 | 0.016 | 0.018 | 0.000 | 0.000 | 0.000 | 0.000 | 0.000 | 0.000 | 0.000 | 0.000 | 0.000 | 0.000 |       |
|       | B   | 0.156 | 0.419 | 0.000 | 0.110 | 0.000 | 0.032 | 0.000 | 0.102 | 0.043 | 0.065 | 0.043 | 0.016 | 0.013 | 0.000 | 0.000 | 0.000 | 0.000 |       |
|       | N2  | 0.478 | 0.031 | 0.000 | 0.000 | 0.012 | 0.000 | 0.000 | 0.000 | 0.176 | 0.000 | 0.059 | 0.000 | 0.000 | 0.201 | 0.009 | 0.028 | 0.006 |       |
| SSR18 | A   | 0.162 | 0.553 | 0.136 | 0.144 | 0.005 |       |       |       |       |       |       |       |       |       |       |       |       |       |
|       | B   | 0.377 | 0.187 | 0.172 | 0.265 | 0.000 |       |       |       |       |       |       |       |       |       |       |       |       |       |
|       | N2  | 0.295 | 0.670 | 0.035 | 0.000 | 0.000 |       |       |       |       |       |       |       |       |       |       |       |       |       |
| SSR19 | A   | 0.091 | 0.436 | 0.037 | 0.139 | 0.057 | 0.010 | 0.230 | 0.000 | 0.000 | 0.000 |       |       |       |       |       |       |       |       |
|       | B   | 0.000 | 0.250 | 0.148 | 0.207 | 0.000 | 0.043 | 0.179 | 0.170 | 0.003 | 0.000 |       |       |       |       |       |       |       |       |
|       | N2  | 0.000 | 0.191 | 0.000 | 0.165 | 0.015 | 0.180 | 0.257 | 0.000 | 0.000 | 0.191 |       |       |       |       |       |       |       |       |
| SSR21 | A   | 0.074 | 0.063 | 0.005 | 0.008 | 0.330 | 0.181 | 0.234 | 0.011 | 0.093 | 0.000 |       |       |       |       |       |       |       |       |
|       | B   | 0.413 | 0.379 | 0.003 | 0.203 | 0.003 | 0.000 | 0.000 | 0.000 | 0.000 | 0.000 |       |       |       |       |       |       |       |       |
|       | N2  | 0.291 | 0.333 | 0.000 | 0.161 | 0.212 | 0.000 | 0.000 | 0.000 | 0.000 | 0.003 |       |       |       |       |       |       |       |       |
| SSR22 | A   | 0.946 | 0.054 | 0.000 |       |       |       |       |       |       |       |       |       |       |       |       |       |       |       |
|       | B   | 0.961 | 0.008 | 0.031 |       |       |       |       |       |       |       |       |       |       |       |       |       |       |       |
|       | N2  | 0.325 | 0.675 | 0.000 |       |       |       |       |       |       |       |       |       |       |       |       |       |       |       |

**Table S8.** The results of heterozygosity, *f*-statistics, and polymorphism by population for codominant data.

| Population | N | Na | Ne | I | Ho | He | uHe | F | Pic |
|------------|---|----|----|---|----|----|-----|---|-----|
|------------|---|----|----|---|----|----|-----|---|-----|

|    |      |         |       |       |       |       |       |       |        |       |
|----|------|---------|-------|-------|-------|-------|-------|-------|--------|-------|
| A  | Mean | 181.300 | 6.200 | 3.015 | 1.247 | 0.634 | 0.633 | 0.635 | -0.042 | 0.583 |
|    | SE   | 4.271   | 0.512 | 0.314 | 0.104 | 0.051 | 0.039 | 0.039 | 0.116  | 0.136 |
| B  | Mean | 165.000 | 7.000 | 3.907 | 1.485 | 0.591 | 0.718 | 0.720 | 0.167  | 0.675 |
|    | SE   | 10.817  | 1.135 | 0.368 | 0.126 | 0.060 | 0.033 | 0.033 | 0.084  | 0.122 |
| N2 | Mean | 179.600 | 4.600 | 2.786 | 1.079 | 0.656 | 0.591 | 0.592 | -0.057 | 0.527 |
|    | SE   | 6.021   | 0.653 | 0.345 | 0.125 | 0.095 | 0.048 | 0.048 | 0.109  | 0.170 |

N = Number of alleles.  $N_a$  = No. of Different Alleles.  $N_e$  = No. of Effective Alleles.  $I$  = Shannon's Information Index.  $H_o$  = Observed Heterozygosity  $H_e$  = Expected Heterozygosity.  $uH_e$  = Unbiased Expected Heterozygosity.  $F$  = Fixation Index. PIC = polymorphic information content.

**Table S9.** Pairwise population  $F_{ST}$  values and estimates of  $N_m$ .

| Pop1 | Pop2 | Fst   | Nm    | #Pop1 | #Pop2 |
|------|------|-------|-------|-------|-------|
| A    | B    | 0.114 | 1.950 | 192   | 192   |
| A    | N2   | 0.102 | 2.191 | 192   | 192   |
| B    | N2   | 0.098 | 2.294 | 192   | 192   |

$F_{ST}$  = genetic differentiation coefficient =  $(H_t - \text{Mean } H_e) / H_t$ ;  $N_m$  = number of migrants per generation =  $[(1 / F_{ST}) - 1] / 4$ .

**Table S10.** The genotypes with count, % within Group, and % within Genotype in the dead and alive group.

| SSR  | Genotype | Pop | Count | Count | Dead group     |                   | count | Alive group    |                   |
|------|----------|-----|-------|-------|----------------|-------------------|-------|----------------|-------------------|
|      |          |     |       |       | % within Group | % within Genotype |       | % within Group | % within Genotype |
| SSR2 | AC       | A   | 24    | 22    | 17.9           | 91.7              | 2     | 3.4            | 8.3               |
|      | AD       | A   | 18    | 18    | 14.6           | 100               | 0     | 0              | 0                 |
|      | BC       | A   | 49    | 24    | 19.5           | 49                | 25    | 43.1           | 51                |
|      |          | B   | 40    | 30    | 26.3           | 75                | 10    | 37             | 25                |
|      |          | N2  | 94    | 78    | 52.3           | 83                | 16    | 40             | 17                |
|      | CC       | A   | 38    | 17    | 13.8           | 44.7              | 21    | 36.5           | 55.3              |
|      |          | B   | 11    | 8     | 7              | 72.7              | 3     | 11.1           | 27.3              |
|      |          | N2  | 40    | 23    | 15.4           | 57.5              | 17    | 42.5           | 42.5              |
|      | CF       | N2  | 36    | 34    | 22.8           | 94.4              | 2     | 5              | 5.6               |
| SSR4 | AC       | A   | 2     | 2     | 1.5            | 100               | 0     | 0              | 0                 |
|      |          | B   | 35    | 30    | 22.2           | 85.7              | 5     | 10.2           | 14.3              |
|      | BC       | A   | 39    | 29    | 21.6           | 74.4              | 10    | 17.2           | 25.6              |
|      | CC       | A   | 51    | 45    | 33.6           | 88.2              | 6     | 10.4           | 11.8              |
|      |          | B   | 11    | 9     | 6.7            | 81.8              | 2     | 4.1            | 18.2              |
|      |          | N2  | 52    | 43    | 28.3           | 82.7              | 9     | 22.5           | 17.4              |
|      | DD       | A   | 1     | 1     | 0.7            | 100               | 0     | 0              | 0                 |
|      |          | B   | 18    | 11    | 8.1            | 61.1              | 7     | 14.3           | 38.9              |
|      |          | N2  | 26    | 18    | 11.8           | 69.2              | 8     | 20             | 30.8              |
| SSR5 | DE       | A   | 8     | 1     | 0.7            | 12.5              | 7     | 12.1           | 87.5              |
|      | EF       | A   | 2     | 0     | 0              | 0                 | 2     | 3.8            | 100               |
|      | MN       | A   | 22    | 21    | 16.3           | 95.5              | 1     | 1.9            | 4.5               |
|      | LQ       | B   | 20    | 19    | 13.8           | 95                | 1     | 1.9            | 5                 |
| SSR7 | PQ       | B   | 5     | 0     | 0              | 0                 | 5     | 9.3            | 100               |
|      | CD       | A   | 187   | 129   | 96.3           | 69                | 58    | 100            | 31                |

|       |    |    |     |    |      |      |    |      |      |
|-------|----|----|-----|----|------|------|----|------|------|
|       |    | B  | 69  | 57 | 41   | 82.6 | 12 | 22.6 | 17.4 |
|       | CE | B  | 68  | 42 | 30.2 | 61.8 | 26 | 49.1 | 38.2 |
|       |    | N2 | 36  | 30 | 19.7 | 83.3 | 6  | 15   | 16.7 |
|       | EE | B  | 1   | 0  | 0    | 0    | 1  | 1.9  | 100  |
|       | EG | B  | 5   | 2  | 1.4  | 40   | 3  | 5.7  | 60   |
| SSR8  | BF | A  | 13  | 12 | 10.6 | 92.3 | 1  | 1.8  | 7.7  |
|       | CF | A  | 25  | 8  | 7.1  | 32   | 17 | 29.8 | 68   |
|       | EF | A  | 18  | 17 | 15   | 94.4 | 1  | 1.8  | 5.6  |
| SSR14 | BC | A  | 5   | 0  | 0    | 0    | 5  | 9.3  | 100  |
|       |    | B  | 2   | 2  | 1.5  | 100  | 0  | 0    | 0    |
|       | CC | A  | 70  | 42 | 32.3 | 60   | 28 | 51.9 | 40   |
|       |    | B  | 15  | 8  | 6    | 53.3 | 7  | 14.3 | 46.7 |
|       |    | N2 | 25  | 18 | 11.8 | 72   | 7  | 17.5 | 28   |
|       | CD | B  | 9   | 7  | 5.2  | 77.8 | 2  | 4.1  | 22.2 |
|       |    | N2 | 53  | 46 | 30.3 | 86.8 | 7  | 17.5 | 13.2 |
|       | CE | A  | 29  | 14 | 10.8 | 48.3 | 15 | 27.8 | 51.7 |
|       | CH | A  | 65  | 60 | 46.2 | 92.3 | 5  | 9.3  | 7.7  |
|       |    | N2 | 3   | 3  | 2    | 100  | 0  | 0    | 0    |
|       | HI | A  | 7   | 7  | 5.4  | 100  | 0  | 0    | 0    |
|       | FH | N2 | 6   | 2  | 1.3  | 33.3 | 4  | 10   | 66.7 |
| SSR17 | AC | A  | 21  | 3  | 2.2  | 14.3 | 18 | 31   | 85.7 |
|       | AE | A  | 47  | 43 | 32.1 | 91.5 | 4  | 6.9  | 8.5  |
|       |    | N2 | 2   | 2  | 1.5  | 100  | 0  | 0    | 0    |
|       | AI | N2 | 43  | 36 | 26.9 | c.7  | 7  | 25   | 16.3 |
|       | AK | N2 | 13  | 7  | 5.2  | 53.8 | 6  | 21.4 | 46.2 |
| SSR18 | AA | A  | 7   | 1  | 0.7  | 14.3 | 6  | 11.5 | 85.7 |
|       |    | B  | 40  | 29 | 30.9 | 72.5 | 11 | 27.5 | 27.5 |
|       |    | N2 | 44  | 34 | 23   | 77.3 | 10 | 25   | 22.7 |
|       | AC | A  | 5   | 0  | 0    | 0    | 5  | 9.6  | 100  |
|       |    | B  | 8   | 6  | 6.4  | 54.5 | 2  | 5    | 25   |
|       | BB | A  | 57  | 47 | 34.6 | 82.5 | 10 | 19.2 | 17.5 |
|       |    | B  | 18  | 13 | 13.8 | 72.2 | 5  | 12.5 | 27.8 |
|       |    | N2 | 114 | 91 | 61.5 | 79.8 | 23 | 57.5 | 20.2 |
|       | BC | A  | 24  | 21 | 15.4 | 87.5 | 3  | 5.8  | 12.5 |
|       |    | B  | 1   | 0  | 0    | 0    | 1  | 2.5  | 100  |
|       |    | N2 | 1   | 1  | 0.7  | 100  | 0  | 0    | 0    |
|       | BD | A  | 34  | 29 | 21.3 | 85.3 | 5  | 9.6  | 14.7 |
|       |    | B  | 11  | 9  | 9.6  | 81.8 | 2  | 5    | 18.2 |
|       | CC | A  | 6   | 6  | 4.4  | 100  | 0  | 0    | 0    |
|       |    | B  | 17  | 12 | 12.8 | 70.6 | 5  | 12.5 | 29.4 |
|       |    | N2 | 6   | 6  | 4.1  | 100  | 0  | 0    | 0    |
| SSR19 | BB | A  | 47  | 17 | 17.5 | 36.2 | 30 | 53.6 | 63.8 |
|       |    | B  | 14  | 7  | 6.4  | 50   | 7  | 13.2 | 50   |



|       |    |    |      |     |      |      |     |      |      |
|-------|----|----|------|-----|------|------|-----|------|------|
|       | BD | A  | 3    | 3   | 3.1  | 100  | 0   | 0    | 0    |
|       |    | B  | 15   | 10  | 9.2  | 66.7 | 5   | 9.4  | 33.3 |
|       |    | N2 | 15   | 9   | 8.7  | 60   | 6   | 18.2 | 40   |
|       | BF | N2 | 18   | 17  | 16.5 | 94.4 | 1   | 3    | 5.6  |
|       | BG | A  | 26   | 24  | 24.7 | 92.3 | 2   | 3.6  | 7.7  |
|       |    | B  | 14   | 11  | 10.1 | 78.6 | 3   | 5.7  | 21.4 |
|       | DD | B  | 8    | 3   | 2.8  | 37.5 | 5   | 9.4  | 62.5 |
|       |    | N2 | 3    | 3   | 2.9  | 100  | 0   | 0    | 0    |
|       | EE | A  | 3    | 0   | 0    | 0    | 3   | 5.4  | 100  |
|       | GG | A  | 13   | 13  | 13.4 | 100  | 0   | 0    | 0    |
|       |    | B  | 3    | 2   | 1.8  | 66.7 | 1   | 1.9  | 33.3 |
|       |    |    |      |     |      |      |     |      |      |
| SSR21 | EE | A  | 29.6 | 22  | 16.8 | 81.5 | 7.6 | 9.8  | 18.5 |
|       | EF | A  | 23   | 11  | 8.4  | 47.8 | 12  | 23.5 | 52.2 |
|       | EG | A  | 19   | 18  | 13.7 | 94.7 | 1   | 2    | 5.3  |
|       | FF | A  | 10   | 0   | 0    | 0    | 10  | 19.6 | 100  |
|       | FG | A  | 9    | 8   | 6.1  | 88.9 | 1   | 2    | 11.1 |
|       | GG | A  | 14   | 14  | 10.7 | 100  | 0   | 0    | 0    |
|       | GI | A  | 14   | 12  | 9.2  | 85.7 | 2   | 3.9  | 14.3 |
| SSR22 | AA | A  | 165  | 124 | 96.9 | 75.2 | 41  | 71.9 | 24.8 |
|       |    | B  | 178  | 127 | 91.4 | 71.3 | 51  | 96.2 | 28.7 |
|       |    | N2 | 18   | 12  | 8.1  | 66.7 | 6   | 15   | 33.3 |
|       | AB | A  | 20   | 4   | 3.1  | 20   | 16  | 28.1 | 80   |
|       |    | B  | 3    | 3   | 2.2  | 100  | 0   | 0    | 0    |
|       |    | N2 | 87   | 64  | 43   | 73.6 | 23  | 57.7 | 26.4 |
|       | BB | N2 | 84   | 73  | 49   | 86.9 | 11  | 27.5 | 13.1 |

Blue color: relate to death. Red color: relate to survival.

**Table S11.** The different combinations of genotypes and the predictive results of the new *Streptococcus*-resistant groups (F<sub>i</sub>) through SVM predictive model. Three strains were ANT1 (N = 96), AB (N = 55), and BB (N = 40). \$S: The predicted value of target field. Here, the target is death (1). \$SP: Probability of predicted value. \$SP-value: Probability of each possible value of the flag, alive (0) or death (1).

| Group | SSR2 | SSR4 | SSR7 | SSR14 | SSR18 | SSR19 | SSR21 | SSR22 | \$S | \$SP  | \$SP-1 | \$SP-0 |
|-------|------|------|------|-------|-------|-------|-------|-------|-----|-------|--------|--------|
| ANT1  | 9    | 9    | 8    | 0     | 8     | 0     | 2     | 1     | 1   | 0.998 | 0.002  | 0.998  |
| ANT1  | 9    | 7    | 8    | 0     | 8     | 0     | 2     | 1     | 1   | 0.997 | 0.003  | 0.997  |
| ANT1  | 6    | 9    | 8    | 0     | 8     | 0     | 2     | 1     | 1   | 0.997 | 0.003  | 0.997  |
| ANT1  | 9    | 7    | 8    | 0     | 8     | 0     | 2     | 1     | 1   | 0.997 | 0.003  | 0.997  |
| ANT1  | 9    | 9    | 5    | 0     | 8     | 0     | 2     | 1     | 1   | 0.997 | 0.003  | 0.997  |
| ANT1  | 9    | 9    | 5    | 0     | 8     | 0     | 2     | 1     | 1   | 0.997 | 0.003  | 0.997  |
| ANT1  | 6    | 7    | 5    | 0     | 8     | 0     | 2     | 1     | 1   | 0.996 | 0.004  | 0.996  |
| ANT1  | 6    | 7    | 5    | 0     | 8     | 0     | 2     | 1     | 1   | 0.996 | 0.004  | 0.996  |
| ANT1  | 9    | 7    | 8    | 0     | 8     | 0     | 0     | 1     | 1   | 0.996 | 0.004  | 0.996  |
| ANT1  | 9    | 7    | 5    | 0     | 8     | 0     | 2     | 1     | 1   | 0.994 | 0.006  | 0.994  |
| ANT1  | 9    | 2    | 8    | 0     | 8     | 0     | 2     | 2     | 1   | 0.994 | 0.006  | 0.994  |
| ANT1  | 9    | 7    | 5    | 0     | 8     | 0     | 2     | 1     | 1   | 0.994 | 0.006  | 0.994  |

|      |   |   |   |   |   |   |   |   |   |       |       |       |
|------|---|---|---|---|---|---|---|---|---|-------|-------|-------|
| ANT1 | 9 | 7 | 5 | 0 | 8 | 0 | 2 | 1 | 1 | 0.994 | 0.006 | 0.994 |
| ANT1 | 6 | 2 | 5 | 0 | 8 | 0 | 2 | 1 | 1 | 0.994 | 0.006 | 0.994 |
| ANT1 | 9 | 9 | 8 | 0 | 8 | 0 | 2 | 2 | 1 | 0.994 | 0.006 | 0.994 |
| ANT1 | 9 | 2 | 8 | 0 | 8 | 0 | 2 | 2 | 1 | 0.994 | 0.006 | 0.994 |
| ANT1 | 9 | 2 | 8 | 0 | 8 | 0 | 2 | 2 | 1 | 0.994 | 0.006 | 0.994 |
| ANT1 | 9 | 9 | 8 | 0 | 8 | 0 | 2 | 2 | 1 | 0.994 | 0.006 | 0.994 |
| ANT1 | 9 | 9 | 8 | 0 | 8 | 0 | 2 | 2 | 1 | 0.994 | 0.006 | 0.994 |
| ANT1 | 9 | 2 | 8 | 0 | 8 | 0 | 2 | 2 | 1 | 0.994 | 0.006 | 0.994 |
| ANT1 | 9 | 9 | 8 | 0 | 8 | 0 | 2 | 2 | 1 | 0.994 | 0.006 | 0.994 |
| ANT1 | 6 | 2 | 8 | 0 | 8 | 0 | 2 | 1 | 1 | 0.993 | 0.007 | 0.993 |
| ANT1 | 6 | 2 | 8 | 0 | 8 | 0 | 2 | 1 | 1 | 0.993 | 0.007 | 0.993 |
| ANT1 | 9 | 7 | 8 | 0 | 8 | 0 | 2 | 2 | 1 | 0.993 | 0.007 | 0.993 |
| ANT1 | 9 | 7 | 8 | 0 | 8 | 0 | 2 | 2 | 1 | 0.993 | 0.007 | 0.993 |
| ANT1 | 9 | 7 | 5 | 0 | 8 | 0 | 0 | 1 | 1 | 0.99  | 0.01  | 0.99  |
| ANT1 | 9 | 9 | 5 | 0 | 8 | 0 | 2 | 2 | 1 | 0.989 | 0.011 | 0.989 |
| ANT1 | 9 | 9 | 5 | 0 | 8 | 0 | 2 | 2 | 1 | 0.989 | 0.011 | 0.989 |
| ANT1 | 9 | 0 | 5 | 0 | 8 | 0 | 2 | 1 | 1 | 0.989 | 0.011 | 0.989 |
| ANT1 | 9 | 0 | 5 | 0 | 8 | 0 | 2 | 1 | 1 | 0.989 | 0.011 | 0.989 |
| ANT1 | 9 | 0 | 5 | 0 | 8 | 0 | 2 | 1 | 1 | 0.989 | 0.011 | 0.989 |
| ANT1 | 6 | 0 | 5 | 0 | 8 | 0 | 2 | 1 | 1 | 0.989 | 0.011 | 0.989 |
| ANT1 | 6 | 0 | 5 | 0 | 8 | 0 | 2 | 1 | 1 | 0.989 | 0.011 | 0.989 |
| ANT1 | 6 | 0 | 5 | 0 | 8 | 0 | 2 | 1 | 1 | 0.989 | 0.011 | 0.989 |
| ANT1 | 9 | 9 | 5 | 0 | 8 | 0 | 2 | 2 | 1 | 0.989 | 0.011 | 0.989 |
| ANT1 | 9 | 0 | 5 | 0 | 8 | 0 | 2 | 1 | 1 | 0.989 | 0.011 | 0.989 |
| ANT1 | 6 | 0 | 5 | 0 | 8 | 0 | 2 | 1 | 1 | 0.989 | 0.011 | 0.989 |
| ANT1 | 0 | 2 | 5 | 0 | 8 | 0 | 2 | 1 | 1 | 0.989 | 0.011 | 0.989 |
| ANT1 | 6 | 9 | 5 | 0 | 8 | 0 | 2 | 2 | 1 | 0.988 | 0.012 | 0.988 |
| ANT1 | 6 | 9 | 5 | 0 | 8 | 0 | 2 | 2 | 1 | 0.988 | 0.012 | 0.988 |
| ANT1 | 0 | 7 | 8 | 0 | 8 | 0 | 0 | 1 | 1 | 0.987 | 0.013 | 0.987 |
| ANT1 | 9 | 7 | 5 | 0 | 8 | 0 | 2 | 2 | 1 | 0.985 | 0.015 | 0.985 |
| ANT1 | 9 | 7 | 5 | 0 | 8 | 0 | 2 | 2 | 1 | 0.985 | 0.015 | 0.985 |
| ANT1 | 9 | 7 | 5 | 0 | 8 | 0 | 2 | 2 | 1 | 0.985 | 0.015 | 0.985 |
| ANT1 | 9 | 7 | 5 | 0 | 8 | 0 | 2 | 2 | 1 | 0.985 | 0.015 | 0.985 |
| ANT1 | 6 | 9 | 8 | 0 | 8 | 0 | 2 | 2 | 1 | 0.984 | 0.016 | 0.984 |
| ANT1 | 6 | 7 | 5 | 0 | 8 | 0 | 2 | 2 | 1 | 0.983 | 0.017 | 0.983 |
| ANT1 | 6 | 7 | 5 | 0 | 8 | 0 | 2 | 2 | 1 | 0.983 | 0.017 | 0.983 |
| ANT1 | 6 | 7 | 5 | 0 | 8 | 0 | 2 | 2 | 1 | 0.983 | 0.017 | 0.983 |
| ANT1 | 6 | 2 | 5 | 0 | 8 | 0 | 2 | 2 | 1 | 0.982 | 0.018 | 0.982 |
| ANT1 | 6 | 2 | 8 | 0 | 8 | 0 | 2 | 2 | 1 | 0.981 | 0.019 | 0.981 |
| ANT1 | 6 | 2 | 8 | 0 | 8 | 0 | 2 | 2 | 1 | 0.981 | 0.019 | 0.981 |
| ANT1 | 6 | 0 | 8 | 0 | 8 | 0 | 2 | 1 | 1 | 0.981 | 0.019 | 0.981 |
| ANT1 | 6 | 0 | 8 | 0 | 8 | 0 | 2 | 1 | 1 | 0.981 | 0.019 | 0.981 |
| ANT1 | 6 | 2 | 8 | 0 | 8 | 0 | 2 | 2 | 1 | 0.981 | 0.019 | 0.981 |

|      |    |   |   |    |   |   |    |   |   |       |       |       |
|------|----|---|---|----|---|---|----|---|---|-------|-------|-------|
| ANT1 | 6  | 2 | 8 | 0  | 8 | 0 | 2  | 2 | 1 | 0.981 | 0.019 | 0.981 |
| ANT1 | 6  | 0 | 8 | 0  | 8 | 0 | 2  | 1 | 1 | 0.981 | 0.019 | 0.981 |
| ANT1 | 9  | 0 | 5 | 0  | 8 | 0 | 2  | 2 | 1 | 0.98  | 0.02  | 0.98  |
| ANT1 | 6  | 0 | 5 | 0  | 8 | 0 | 2  | 2 | 1 | 0.97  | 0.03  | 0.97  |
| ANT1 | 6  | 0 | 5 | 0  | 8 | 0 | 2  | 2 | 1 | 0.97  | 0.03  | 0.97  |
| ANT1 | 9  | 0 | 5 | 0  | 8 | 0 | 0  | 2 | 1 | 0.963 | 0.037 | 0.963 |
| ANT1 | 6  | 0 | 8 | 0  | 8 | 0 | 2  | 2 | 1 | 0.96  | 0.04  | 0.96  |
| ANT1 | 9  | 9 | 5 | 0  | 8 | 5 | 0  | 1 | 1 | 0.956 | 0.044 | 0.956 |
| ANT1 | 9  | 9 | 5 | 0  | 8 | 5 | 0  | 1 | 1 | 0.956 | 0.044 | 0.956 |
| ANT1 | 9  | 9 | 5 | 0  | 8 | 5 | 0  | 1 | 1 | 0.956 | 0.044 | 0.956 |
| ANT1 | 9  | 7 | 8 | 0  | 8 | 5 | 0  | 1 | 1 | 0.949 | 0.051 | 0.949 |
| ANT1 | 6  | 9 | 5 | 0  | 8 | 5 | 0  | 1 | 1 | 0.931 | 0.069 | 0.931 |
| ANT1 | 9  | 9 | 5 | 0  | 8 | 5 | 2  | 2 | 1 | 0.924 | 0.076 | 0.924 |
| ANT1 | 9  | 7 | 5 | 0  | 8 | 5 | 0  | 1 | 1 | 0.918 | 0.082 | 0.918 |
| ANT1 | 9  | 7 | 5 | 0  | 8 | 5 | 0  | 1 | 1 | 0.918 | 0.082 | 0.918 |
| ANT1 | 9  | 7 | 5 | 0  | 8 | 5 | 0  | 1 | 1 | 0.918 | 0.082 | 0.918 |
| ANT1 | 9  | 2 | 8 | 0  | 8 | 5 | 0  | 2 | 1 | 0.915 | 0.085 | 0.915 |
| ANT1 | 9  | 2 | 8 | 0  | 8 | 5 | 0  | 2 | 1 | 0.915 | 0.085 | 0.915 |
| ANT1 | 6  | 0 | 5 | 0  | 8 | 0 | 0  | 2 | 1 | 0.91  | 0.09  | 0.91  |
| ANT1 | 6  | 0 | 5 | 0  | 8 | 0 | 0  | 2 | 1 | 0.91  | 0.09  | 0.91  |
| ANT1 | 9  | 7 | 8 | 0  | 8 | 5 | 0  | 2 | 1 | 0.908 | 0.092 | 0.908 |
| ANT1 | 9  | 2 | 5 | 0  | 8 | 5 | 0  | 1 | 1 | 0.907 | 0.093 | 0.907 |
| ANT1 | 9  | 7 | 5 | 0  | 0 | 5 | 0  | 2 | 1 | 0.903 | 0.097 | 0.903 |
| ANT1 | 9  | 9 | 5 | 0  | 8 | 5 | 0  | 2 | 1 | 0.882 | 0.118 | 0.882 |
| ANT1 | 9  | 9 | 5 | 0  | 8 | 5 | 0  | 2 | 1 | 0.882 | 0.118 | 0.882 |
| ANT1 | 6  | 7 | 5 | 0  | 8 | 5 | 0  | 1 | 1 | 0.863 | 0.137 | 0.863 |
| ANT1 | 9  | 7 | 5 | 0  | 8 | 5 | 0  | 2 | 1 | 0.85  | 0.15  | 0.85  |
| ANT1 | 9  | 7 | 5 | 0  | 8 | 5 | 0  | 2 | 1 | 0.85  | 0.15  | 0.85  |
| ANT1 | 6  | 2 | 5 | 0  | 8 | 5 | 0  | 1 | 1 | 0.825 | 0.175 | 0.825 |
| ANT1 | 6  | 2 | 5 | 0  | 8 | 5 | 0  | 1 | 1 | 0.825 | 0.175 | 0.825 |
| ANT1 | 9  | 0 | 5 | 0  | 8 | 5 | 0  | 2 | 1 | 0.794 | 0.206 | 0.794 |
| ANT1 | 6  | 0 | 5 | 0  | 8 | 5 | 2  | 2 | 1 | 0.758 | 0.242 | 0.758 |
| ANT1 | 6  | 0 | 5 | 0  | 8 | 5 | 2  | 2 | 1 | 0.758 | 0.242 | 0.758 |
| ANT1 | 6  | 7 | 5 | 0  | 8 | 5 | 0  | 2 | 1 | 0.705 | 0.295 | 0.705 |
| ANT1 | 6  | 2 | 5 | 0  | 8 | 5 | 0  | 2 | 1 | 0.691 | 0.309 | 0.691 |
| ANT1 | 6  | 2 | 5 | 0  | 8 | 5 | 0  | 2 | 1 | 0.691 | 0.309 | 0.691 |
| ANT1 | 6  | 2 | 5 | 0  | 8 | 5 | 0  | 2 | 1 | 0.691 | 0.309 | 0.691 |
| ANT1 | 6  | 0 | 5 | 0  | 8 | 5 | 0  | 1 | 1 | 0.683 | 0.317 | 0.683 |
| ANT1 | 6  | 7 | 8 | 0  | 8 | 5 | 0  | 2 | 1 | 0.65  | 0.35  | 0.65  |
| ANT1 | 6  | 2 | 8 | 0  | 8 | 5 | 0  | 2 | 1 | 0.636 | 0.364 | 0.636 |
| ANT1 | 6  | 0 | 8 | 0  | 8 | 5 | 0  | 2 | 0 | 0.571 | 0.571 | 0.429 |
| AB   | 10 | 9 | 7 | 10 | 7 | 9 | 16 | 1 | 1 | 0.999 | 0.001 | 0.999 |
| AB   | 10 | 9 | 7 | 10 | 7 | 9 | 16 | 1 | 1 | 0.999 | 0.001 | 0.999 |

|    |    |    |   |    |    |    |    |   |   |       |       |       |
|----|----|----|---|----|----|----|----|---|---|-------|-------|-------|
| AB | 10 | 9  | 7 | 10 | 7  | 9  | 16 | 1 | 1 | 0.999 | 0.001 | 0.999 |
| AB | 10 | 9  | 7 | 10 | 7  | 25 | 16 | 1 | 1 | 0.998 | 0.002 | 0.998 |
| AB | 9  | 9  | 8 | 10 | 0  | 0  | 1  | 2 | 1 | 0.998 | 0.002 | 0.998 |
| AB | 10 | 8  | 7 | 10 | 7  | 0  | 16 | 1 | 1 | 0.997 | 0.003 | 0.997 |
| AB | 10 | 8  | 7 | 10 | 7  | 0  | 16 | 1 | 1 | 0.997 | 0.003 | 0.997 |
| AB | 10 | 9  | 7 | 10 | 11 | 0  | 4  | 2 | 1 | 0.996 | 0.004 | 0.996 |
| AB | 10 | 9  | 7 | 10 | 11 | 0  | 16 | 2 | 1 | 0.995 | 0.005 | 0.995 |
| AB | 9  | 10 | 7 | 10 | 7  | 0  | 16 | 2 | 1 | 0.995 | 0.005 | 0.995 |
| AB | 10 | 11 | 7 | 10 | 11 | 0  | 4  | 1 | 1 | 0.994 | 0.006 | 0.994 |
| AB | 10 | 9  | 7 | 10 | 7  | 9  | 16 | 2 | 1 | 0.992 | 0.008 | 0.992 |
| AB | 10 | 9  | 7 | 10 | 8  | 20 | 4  | 1 | 1 | 0.991 | 0.009 | 0.991 |
| AB | 9  | 9  | 7 | 10 | 7  | 9  | 16 | 1 | 1 | 0.99  | 0.01  | 0.99  |
| AB | 10 | 8  | 8 | 10 | 11 | 0  | 4  | 1 | 1 | 0.987 | 0.013 | 0.987 |
| AB | 9  | 10 | 7 | 10 | 7  | 9  | 16 | 1 | 1 | 0.985 | 0.015 | 0.985 |
| AB | 9  | 11 | 8 | 10 | 8  | 0  | 4  | 2 | 1 | 0.985 | 0.015 | 0.985 |
| AB | 10 | 8  | 7 | 10 | 7  | 9  | 16 | 1 | 1 | 0.983 | 0.017 | 0.983 |
| AB | 9  | 10 | 7 | 10 | 7  | 9  | 4  | 1 | 1 | 0.981 | 0.019 | 0.981 |
| AB | 10 | 8  | 7 | 10 | 8  | 0  | 4  | 2 | 1 | 0.977 | 0.023 | 0.977 |
| AB | 9  | 8  | 7 | 10 | 7  | 0  | 16 | 2 | 1 | 0.969 | 0.031 | 0.969 |
| AB | 9  | 11 | 7 | 10 | 0  | 0  | 1  | 2 | 1 | 0.965 | 0.035 | 0.965 |
| AB | 10 | 9  | 8 | 10 | 8  | 20 | 4  | 1 | 1 | 0.96  | 0.04  | 0.96  |
| AB | 9  | 11 | 7 | 10 | 8  | 0  | 4  | 1 | 1 | 0.959 | 0.041 | 0.959 |
| AB | 9  | 8  | 7 | 10 | 8  | 0  | 4  | 1 | 1 | 0.948 | 0.052 | 0.948 |
| AB | 10 | 9  | 8 | 10 | 8  | 20 | 4  | 2 | 1 | 0.948 | 0.052 | 0.948 |
| AB | 9  | 11 | 7 | 10 | 8  | 0  | 4  | 2 | 1 | 0.943 | 0.057 | 0.943 |
| AB | 10 | 10 | 7 | 10 | 0  | 7  | 1  | 1 | 1 | 0.932 | 0.068 | 0.932 |
| AB | 9  | 11 | 0 | 10 | 7  | 9  | 16 | 2 | 1 | 0.931 | 0.069 | 0.931 |
| AB | 9  | 11 | 7 | 10 | 7  | 9  | 16 | 1 | 1 | 0.931 | 0.069 | 0.931 |
| AB | 9  | 10 | 8 | 10 | 8  | 20 | 4  | 1 | 1 | 0.92  | 0.08  | 0.92  |
| AB | 9  | 10 | 8 | 10 | 8  | 20 | 4  | 1 | 1 | 0.92  | 0.08  | 0.92  |
| AB | 10 | 11 | 7 | 10 | 8  | 20 | 4  | 1 | 1 | 0.914 | 0.086 | 0.914 |
| AB | 10 | 10 | 7 | 10 | 11 | 4  | 16 | 2 | 1 | 0.897 | 0.103 | 0.897 |
| AB | 9  | 10 | 7 | 10 | 8  | 20 | 4  | 1 | 1 | 0.888 | 0.112 | 0.888 |
| AB | 9  | 10 | 7 | 10 | 8  | 20 | 4  | 1 | 1 | 0.888 | 0.112 | 0.888 |
| AB | 9  | 8  | 7 | 10 | 7  | 9  | 16 | 2 | 1 | 0.875 | 0.125 | 0.875 |
| AB | 9  | 10 | 8 | 10 | 11 | 4  | 4  | 2 | 1 | 0.87  | 0.13  | 0.87  |
| AB | 9  | 10 | 8 | 10 | 11 | 4  | 4  | 2 | 1 | 0.87  | 0.13  | 0.87  |
| AB | 10 | 9  | 8 | 10 | 0  | 7  | 1  | 2 | 1 | 0.863 | 0.137 | 0.863 |
| AB | 10 | 8  | 7 | 10 | 8  | 20 | 4  | 2 | 1 | 0.837 | 0.163 | 0.837 |
| AB | 9  | 11 | 7 | 10 | 11 | 4  | 4  | 1 | 0 | 0.763 | 0.763 | 0.237 |
| AB | 9  | 10 | 7 | 10 | 0  | 7  | 1  | 2 | 1 | 0.749 | 0.251 | 0.749 |
| AB | 9  | 10 | 7 | 10 | 0  | 7  | 1  | 2 | 1 | 0.749 | 0.251 | 0.749 |
| AB | 9  | 10 | 7 | 10 | 11 | 4  | 16 | 2 | 1 | 0.74  | 0.26  | 0.74  |

|    |    |    |   |    |    |    |    |   |   |       |       |       |
|----|----|----|---|----|----|----|----|---|---|-------|-------|-------|
| AB | 10 | 8  | 8 | 10 | 11 | 4  | 4  | 2 | 1 | 0.706 | 0.294 | 0.706 |
| AB | 10 | 8  | 8 | 10 | 0  | 7  | 1  | 2 | 1 | 0.706 | 0.294 | 0.706 |
| AB | 9  | 11 | 7 | 10 | 0  | 7  | 1  | 2 | 0 | 0.655 | 0.655 | 0.345 |
| AB | 9  | 11 | 7 | 10 | 8  | 20 | 4  | 2 | 1 | 0.651 | 0.349 | 0.651 |
| AB | 10 | 8  | 7 | 10 | 11 | 4  | 4  | 2 | 1 | 0.65  | 0.35  | 0.65  |
| AB | 9  | 11 | 7 | 10 | 8  | 20 | 4  | 1 | 1 | 0.632 | 0.368 | 0.632 |
| AB | 9  | 8  | 7 | 10 | 8  | 20 | 16 | 2 | 1 | 0.625 | 0.375 | 0.625 |
| AB | 9  | 8  | 7 | 10 | 0  | 7  | 1  | 1 | 0 | 0.598 | 0.598 | 0.402 |
| AB | 10 | 8  | 8 | 10 | 11 | 4  | 1  | 1 | 1 | 0.582 | 0.418 | 0.582 |
| AB | 10 | 8  | 7 | 10 | 0  | 7  | 1  | 2 | 1 | 0.516 | 0.484 | 0.516 |
| BB | 7  | 7  | 8 | 16 | 7  | 0  | 16 | 1 | 1 | 0.997 | 0.003 | 0.997 |
| BB | 7  | 7  | 8 | 16 | 5  | 0  | 16 | 1 | 1 | 0.994 | 0.006 | 0.994 |
| BB | 12 | 7  | 8 | 16 | 5  | 0  | 16 | 1 | 1 | 0.988 | 0.012 | 0.988 |
| BB | 12 | 7  | 8 | 16 | 5  | 0  | 16 | 1 | 1 | 0.988 | 0.012 | 0.988 |
| BB | 12 | 7  | 8 | 16 | 5  | 0  | 16 | 1 | 1 | 0.988 | 0.012 | 0.988 |
| BB | 7  | 7  | 8 | 16 | 7  | 9  | 16 | 1 | 1 | 0.979 | 0.021 | 0.979 |
| BB | 7  | 7  | 8 | 16 | 7  | 9  | 16 | 1 | 1 | 0.979 | 0.021 | 0.979 |
| BB | 10 | 8  | 8 | 16 | 7  | 0  | 16 | 1 | 1 | 0.979 | 0.021 | 0.979 |
| BB | 7  | 7  | 8 | 10 | 5  | 25 | 16 | 1 | 1 | 0.969 | 0.031 | 0.969 |
| BB | 10 | 8  | 8 | 16 | 5  | 0  | 16 | 1 | 1 | 0.963 | 0.037 | 0.963 |
| BB | 10 | 8  | 8 | 16 | 5  | 0  | 16 | 1 | 1 | 0.963 | 0.037 | 0.963 |
| BB | 10 | 8  | 8 | 16 | 5  | 0  | 16 | 1 | 1 | 0.963 | 0.037 | 0.963 |
| BB | 12 | 7  | 8 | 16 | 7  | 9  | 16 | 1 | 1 | 0.938 | 0.062 | 0.938 |
| BB | 12 | 7  | 8 | 16 | 7  | 9  | 16 | 1 | 1 | 0.938 | 0.062 | 0.938 |
| BB | 7  | 7  | 8 | 16 | 5  | 25 | 16 | 1 | 1 | 0.928 | 0.072 | 0.928 |
| BB | 7  | 7  | 8 | 16 | 5  | 25 | 16 | 1 | 1 | 0.928 | 0.072 | 0.928 |
| BB | 7  | 7  | 8 | 16 | 5  | 25 | 16 | 1 | 1 | 0.928 | 0.072 | 0.928 |
| BB | 7  | 7  | 8 | 16 | 5  | 25 | 16 | 1 | 1 | 0.928 | 0.072 | 0.928 |
| BB | 10 | 8  | 8 | 10 | 7  | 9  | 16 | 1 | 1 | 0.925 | 0.075 | 0.925 |
| BB | 10 | 8  | 8 | 10 | 5  | 25 | 16 | 1 | 1 | 0.872 | 0.128 | 0.872 |
| BB | 6  | 8  | 8 | 16 | 7  | 0  | 16 | 1 | 1 | 0.861 | 0.139 | 0.861 |
| BB | 6  | 8  | 8 | 16 | 7  | 0  | 16 | 1 | 1 | 0.861 | 0.139 | 0.861 |
| BB | 6  | 8  | 8 | 16 | 7  | 0  | 16 | 1 | 1 | 0.861 | 0.139 | 0.861 |
| BB | 12 | 7  | 8 | 16 | 5  | 25 | 16 | 1 | 1 | 0.853 | 0.147 | 0.853 |
| BB | 12 | 7  | 8 | 16 | 5  | 25 | 16 | 1 | 1 | 0.853 | 0.147 | 0.853 |
| BB | 10 | 8  | 8 | 16 | 7  | 9  | 16 | 1 | 1 | 0.829 | 0.171 | 0.829 |
| BB | 6  | 8  | 8 | 16 | 5  | 0  | 16 | 1 | 1 | 0.796 | 0.204 | 0.796 |
| BB | 6  | 8  | 8 | 16 | 5  | 25 | 16 | 1 | 0 | 0.779 | 0.779 | 0.221 |
| BB | 6  | 8  | 8 | 16 | 5  | 25 | 16 | 1 | 0 | 0.779 | 0.779 | 0.221 |
| BB | 6  | 8  | 8 | 16 | 5  | 25 | 16 | 1 | 0 | 0.779 | 0.779 | 0.221 |
| BB | 6  | 8  | 8 | 16 | 5  | 25 | 16 | 1 | 0 | 0.779 | 0.779 | 0.221 |
| BB | 10 | 8  | 8 | 16 | 5  | 25 | 16 | 1 | 1 | 0.656 | 0.344 | 0.656 |
| BB | 10 | 8  | 8 | 16 | 5  | 25 | 16 | 1 | 1 | 0.656 | 0.344 | 0.656 |

|    |    |   |   |    |   |    |    |   |   |       |       |       |
|----|----|---|---|----|---|----|----|---|---|-------|-------|-------|
| BB | 10 | 8 | 8 | 16 | 5 | 25 | 16 | 1 | 1 | 0.656 | 0.344 | 0.656 |
| BB | 10 | 8 | 8 | 16 | 5 | 25 | 16 | 1 | 1 | 0.656 | 0.344 | 0.656 |
| BB | 6  | 8 | 8 | 16 | 7 | 9  | 16 | 1 | 0 | 0.592 | 0.592 | 0.408 |
| BB | 6  | 8 | 8 | 16 | 7 | 9  | 16 | 1 | 0 | 0.592 | 0.592 | 0.408 |
| BB | 6  | 8 | 8 | 16 | 7 | 9  | 16 | 1 | 0 | 0.592 | 0.592 | 0.408 |
| BB | 6  | 8 | 8 | 16 | 7 | 9  | 16 | 1 | 0 | 0.592 | 0.592 | 0.408 |
| BB | 6  | 8 | 8 | 16 | 7 | 9  | 16 | 1 | 0 | 0.592 | 0.592 | 0.408 |

---
